# Supplementary material for: Sterically Hindered Quaternary Phosphonium Salts (QPSs): Antimicrobial Activity and Hemolytic and Cytotoxic Properties
Source: MDPI journal article supplement (doi:10.3390/ijms23010086), 2021-12-22
Supplement: s1 [file s1]

## Supplementary Materials

### “Sterically Hindered Quaternary Phosphonium Salts (QPSs): Antimicrobial Activity and Hemolytic and Cytotoxic Properties”

By V.V. Ermolaev<sup>1</sup>, D.M. Arkhipova<sup>1,2\*</sup>, V.A. Miluykov<sup>1</sup>, A.P. Lyubina<sup>1</sup>, S.K. Amerhanova<sup>1</sup>, N.V. Kulik<sup>1</sup>, A.D. Voloshina<sup>1</sup>, V.P. Ananikov<sup>2</sup>

<sup>1</sup> Arbuzov Institute of Organic and Physical Chemistry, FRC Kazan Scientific Center, Russian Academy of Sciences, Arbuzov str. 8, Kazan, 420088, Russian Federation; ermolaev@iopc.ru

<sup>2</sup> N.D. Zelinsky Institute of Organic Chemistry, Russian Academy of Sciences, Leninsky prospect, 47, Moscow, 119991, Russian Federation

\* Correspondence: arkhipova\_daria@ioc.ac.ru

**Table S1.** Antimicrobial activity of QPSs. Minimum inhibitory concentration.

| Compound      | Minimum inhibitory concentration (MIC), µg/ml |           |           |               |               |           |           |           |           |
|---------------|-----------------------------------------------|-----------|-----------|---------------|---------------|-----------|-----------|-----------|-----------|
|               | <i>Sa</i>                                     | <i>Bc</i> | <i>Ef</i> | <i>MRSA-1</i> | <i>MRSA-2</i> | <i>Ec</i> | <i>Pa</i> | <i>Tm</i> | <i>Ca</i> |
| <b>1a</b>     | -                                             | -         | -         | -             | -             | -         | -         | -         | -         |
| <b>1b</b>     | -                                             | -         | -         | -             | -             | -         | -         | -         | -         |
| <b>2a</b>     | -                                             | -         | -         | -             | -             | -         | -         | -         | -         |
| <b>2b</b>     | -                                             | -         | -         | -             | -             | -         | -         | -         | -         |
| <b>3a</b>     | -                                             | -         | -         | -             | -             | -         | -         | -         | -         |
| <b>3b</b>     | -                                             | -         | -         | -             | -             | -         | -         | -         | -         |
| <b>4a</b>     | -                                             | -         | -         | -             | -             | -         | -         | -         | -         |
| <b>4b</b>     | -                                             | -         | -         | -             | -             | -         | -         | -         | -         |
| <b>5a</b>     | -                                             | -         | -         | -             | -             | -         | -         | -         | -         |
| <b>5b</b>     | -                                             | -         | -         | -             | -             | -         | -         | -         | -         |
| <b>6a</b>     | 125±11                                        | -         | -         | -             | -             | -         | -         | -         | -         |
| <b>6b</b>     | 250±19                                        | -         | -         | -             | -             | -         | -         | -         | -         |
| <b>7a</b>     | 62.5±5.5                                      | 125±10    | 125±      | -             | -             | -         | -         | -         | -         |
| <b>7b</b>     | 62.5±                                         | 125±      | 125±      | -             | -             | -         | -         | -         | -         |
| <b>8a</b>     | 15.6±                                         | 31.3±     | 62.5±     | 15.6±         | 31.3±         | 125±      | -         | -         | -         |
| <b>8b</b>     | 31.3±                                         | 62.5±     | 62.5±     | 31.3±         | 62.5±         | -         | -         | -         | -         |
| <b>9a</b>     | 7.8±                                          | 15.6±     | 62.5±     | 7.8±          | 15.6±         | 125±      | -         | -         | -         |
| <b>9b</b>     | 15.6±                                         | 31.3±     | 31.3±     | 15.6±         | 31.3±         | 250±      | -         | -         | -         |
| Ciprofloxacin | 0.5±0.03                                      | 0.5±0.04  | 3.9±0.3   | 125±11        | 0.9±0.07      | 0.5±0.03  | 0.5±0.03  |           |           |
| Ketoconazole  |                                               |           |           |               |               |           |           | 3.9±0.2   | 3.9±0.3   |

Average of three values measured; ± standard deviation (SD); - means non-active

**Table S1** (cont.). Antimicrobial activity of QPSs. Minimum bactericidal and fungicidal concentration.

| Compound      | Minimum bactericidal and fungicidal concentration (MBC, MFC), µg/ml |           |           |               |               |           |           |           |           |
|---------------|---------------------------------------------------------------------|-----------|-----------|---------------|---------------|-----------|-----------|-----------|-----------|
|               | <i>Sa</i>                                                           | <i>Bc</i> | <i>Ef</i> | <i>MRSA-1</i> | <i>MRSA-2</i> | <i>Ec</i> | <i>Pa</i> | <i>Tm</i> | <i>Ca</i> |
| <b>1a</b>     | -                                                                   | -         | -         | -             | -             | -         | -         | -         | -         |
| <b>1b</b>     | -                                                                   | -         | -         | -             | -             | -         | -         | -         | -         |
| <b>2a</b>     | -                                                                   | -         | -         | -             | -             | -         | -         | -         | -         |
| <b>2b</b>     | -                                                                   | -         | -         | -             | -             | -         | -         | -         | -         |
| <b>3a</b>     | -                                                                   | -         | -         | -             | -             | -         | -         | -         | -         |
| <b>3b</b>     | -                                                                   | -         | -         | -             | -             | -         | -         | -         | -         |
| <b>4a</b>     | -                                                                   | -         | -         | -             | -             | -         | -         | -         | -         |
| <b>4b</b>     | -                                                                   | -         | -         | -             | -             | -         | -         | -         | -         |
| <b>5a</b>     | -                                                                   | -         | -         | -             | -             | -         | -         | -         | -         |
| <b>5b</b>     | -                                                                   | -         | -         | -             | -             | -         | -         | -         | -         |
| <b>6a</b>     | -                                                                   | -         | -         | -             | -             | -         | -         | -         | -         |
| <b>6b</b>     | -                                                                   | -         | -         | -             | -             | -         | -         | -         | -         |
| <b>7a</b>     | -                                                                   | -         | -         | -             | -             | -         | -         | -         | -         |
| <b>7b</b>     | 62.5±                                                               | -         | -         | -             | -             | -         | -         | -         | -         |
| <b>8a</b>     | 62.5±                                                               | -         | -         | -             | -             | 125±      | -         | -         | -         |
| <b>8b</b>     | 31.3±                                                               | -         | 125±      | -             | -             | -         | -         | -         | -         |
| <b>9a</b>     | 15.6±                                                               | 125±      | 125±      | -             | -             | 125±      | -         | -         | -         |
| <b>9b</b>     | 15.6±                                                               | -         | 125±      | -             | -             | 250±      | -         | -         | -         |
| Ciprofloxacin | 0.5±0.03                                                            | 0.5±0.04  | 3.9±0.3   | 250±19        | 0.9±0.06      | 0.5±0.03  | 0.5±0.03  |           |           |
| Ketoconazole  |                                                                     |           |           |               |               |           |           | 3.9±0.2   | 3.9±0.3   |

Average of three values measured; ± standard deviation (SD); - means non-active

**Table S2.** Hemotoxic and cytotoxic activity of QPSs, expressed in terms of HC<sub>50</sub> and IC<sub>50</sub>.

| Compounds  | HC <sub>50</sub> , µg/ml | IC <sub>50</sub> , µg/ml |
|------------|--------------------------|--------------------------|
| <b>1a</b>  | >125                     | >100                     |
| <b>1b</b>  | >125                     | >100                     |
| <b>2a</b>  | >125                     | >100                     |
| <b>2b</b>  | >125                     | >100                     |
| <b>3a</b>  | >125                     | >100                     |
| <b>3b</b>  | >125                     | >100                     |
| <b>4a</b>  | >125                     | >100                     |
| <b>4b</b>  | >125                     | >100                     |
| <b>5a</b>  | >125                     | >100                     |
| <b>5b</b>  | >125                     | >100                     |
| <b>6a</b>  | >125                     | >100                     |
| <b>6b</b>  | >125                     | >100                     |
| <b>7a</b>  | >125                     | >100                     |
| <b>7b</b>  | >125                     | >100                     |
| <b>8a</b>  | >125                     | >100                     |
| <b>8b</b>  | >125                     | >100                     |
| <b>9a</b>  | >125                     | >100                     |
| <b>9b</b>  | >125                     | >100                     |
| <b>10a</b> | >125                     | 66                       |
| <b>10b</b> | >125                     | 71                       |
